# Supplementary material
Source: Springer Nature journal article supplement (https://www.springerprofessional.de/resource/supplementary/13638_2014_1052_MOESM9_ESM.pdf/11898858)

Antenna 1

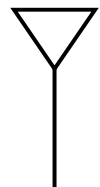

$$x_1[1] = u_1$$

Antenna 2

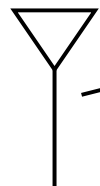

$$x_2[1] = u_2$$

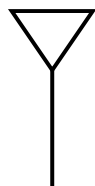

(a) Time 1

Antenna 1

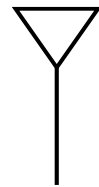

$$x_1[2] = -u_2^*$$

Antenna 2

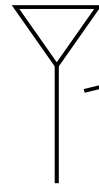

$$x_2[2] = u_1^*$$

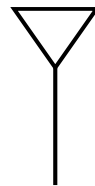

(b) Time 2

Supplement: MOESM9 [file 11898858]
